# Supplementary material for: Analyzing the Interrelationships among Various Ecosystem Services from the Perspective of Ecosystem Service Bundles in Shenyang, China
Source: MDPI journal article supplement (doi:10.3390/land11040515), 2022-04-01
Supplement: s1 [file s1]

## Supplementary material

### Analyzing the interrelationships among various ecosystem services from the perspective of ecosystem service bundles in Shenyang, China

The calculation of ES

#### (1) Food supply

In this study, we used the farmland NPP value as the weight to obtain the spatial distribution pattern of the food supply in Shenyang. The formula is as follow:

$$FS = TP_i \times \frac{NPP_i}{\sum_{i=1}^n NPP_{ii}}$$

In the formula,  $FS$  is food supply ( $\text{g}/\text{m}^2$ ),  $TP_i$  is the annual grain output (t) of the district where grid unit  $i$  is located,  $NPP_i$  is the NPP value of grid unit  $i$  ( $\text{gC}$ ), and  $NPP_{ii}$  is the total NPP ( $\text{gC}$ ) of the farmland in the district where the grid unit  $i$  is located.

#### (2) Grass supply

In this study, we used grassland productivity represent the ability of grass supply. The formula is as following:

$$GS = \sum_{i=1}^n \frac{NPP}{0.44} \times \frac{1}{1+k_i} \times H_i \times R$$

In the formula,  $GS$  is grass supply ( $\text{g}\cdot\text{m}^{-2}$ );  $NPP$  is the net primary productivity of vegetation ( $\text{gC}\cdot\text{m}^{-2}$ ); 0.44 is the conversion coefficient of vegetation in the form of carbon NPP converted to biomass;  $k_i$  is the ratio of below-ground biomass to above-ground biomass of  $i$ -th grass type pasture.  $H_i$  is the standard hay conversion coefficient of the  $i$ -th grass type pasture, and the value is based on the agricultural industry standard of China (NY/T 635-2015).  $R$  is the grazing utilization.

**Table 1.** Calculation parameters of stock carrying capacity of different grassland types in Shenyang.

| Type                                        | Grassy Marshland | Grassland |
|---------------------------------------------|------------------|-----------|
| Belowground to aboveground biomass ratio /k | 7.91             | 8.95      |
| Standard hay conversion coefficient /H      | 1                | 1         |
| Grazing utilization R/%                     | 52.5             | 47.5      |

#### (3) Water conservation

The water balance equation is used to calculate water conservation, which is closely related to precipitation, evapotranspiration, surface runoff, and vegetation coverage types. The formulas are as following:

$$WC = \sum_{i=1}^j (P_i - R_i - ET_i) A_i$$

$$R = P \times \alpha$$

$$ET = \frac{P(1 + \omega \times ET_0 / P)}{(1 + \omega \times ET_0 / P + P / ET_0)}$$

$$ET = \frac{P(1 + \omega \times ET_0 / P)}{(1 + \omega \times ET_0 / P + P / ET_0)}$$

$$ET_0 = \frac{0.408\Delta(R_n - G) + \frac{900}{T + 273} U_2 (e_s - e_a)}{\Delta + \gamma(1 + 0.34U_2)}$$

In the formula,  $WC$  is water conservation ( $m^3/a$ );  $P_i$  is the rainfall (mm);  $R_i$  is the surface runoff (mm);  $ET_i$  is the evapotranspiration (mm);  $A_i$  is the area of the type  $i$  ecosystem;  $i$  is the  $i$ -th ecosystem type in the study area;  $j$  is the number of ecosystem types in the study area,  $\alpha$  is the average surface runoff coefficient (Table S2),  $ET_0$  is the annual average potential evapotranspiration (mm);  $\omega$  is the influence coefficient of the underlying surface (Table S3),  $R_n$  is crop surface net radiation ( $MJ\ m^{-2}\ d^{-1}$ );  $G$  is soil heat flux density ( $MJ\ m^{-2}\ d^{-1}$ );  $T$  is monthly average temperature ( $^{\circ}C$ );  $U_2$  is 2m Wind speed ( $m\ s^{-1}$ );  $e_s$  is saturated water vapor pressure (kPa);  $e_a$  is actual water vapor pressure (kPa);  $\Delta$  is the slope of the saturated water vapor pressure temperature curve ( $kPa\ ^{\circ}C^{-1}$ );  $\gamma$  is the psychrometric constant ( $kPa\ ^{\circ}C^{-1}$ ).

**Table S2.** Mean values of surface runoff coefficients of various ecosystems types.

| Type                         | Average Runoff Coefficient (%) | Type        | Average Runoff Coefficient (%) |
|------------------------------|--------------------------------|-------------|--------------------------------|
| Evergreen coniferous forest  | 4.52                           | Paddy field | 25                             |
| Evergreen broad-leaf forest  | 4.65                           | Farmland    | Irrigable land 18.45           |
| Deciduous coniferous forest  | 0.88                           |             | Dry land 18.45                 |
| Broadleaved deciduous forest | 2.7                            | Settlement  | Urban construction land 45     |
| Theropencedrymion            | 3.52                           |             | Rural Settlement 30            |
| Bush fallow                  | 4.17                           |             | Marsh 0                        |
| Meadow grassland             | 9.13                           |             | Coastal wetland 0              |
| Typical grassland            | 3.94                           | Wetland     | Inland water 0                 |
| Desert grassland             | 18.27                          |             | Hongze lake shoal 0            |
| Alpine meadow                | 8.2                            |             | Ice and snow 0                 |
| Alpine grassland             | 6.54                           |             | Bare rock 70                   |
| Shrubland                    | 5.56                           | Desert      | Bare land 19.72                |
|                              |                                |             | Desert 23                      |

**Table 3.** Reference value of parameter  $\omega$  for evaluating the importance of water conservation function.

| Type     | Farmland | Forest | Bush Fallow | Grassland | Artificial Land | Others |
|----------|----------|--------|-------------|-----------|-----------------|--------|
| $\omega$ | 0.5      | 1.5    | 1           | 0.5       | 0.1             | 0.1    |

#### (4) Carbon sequestration

In this study, the carbon sequestration is calculated according to the photosynthesis equation:  $CO_2 + H_2O \rightarrow CHO + O_2$ . The formulas are as following:

$$CS = NPP \times 1.63$$

where  $CS$  is carbon sequestration (t) and  $NPP$  is net primary productivity (t).

#### (5) $SO_2$ absorption

$$SA = \sum_k \sum_i \frac{NPP_{ij}}{NPP_i} \times P_{SO_2}$$

where  $SA$  is  $SO_2$  absorption ( $kg/(hm^2)$ ),  $NPP_{ij}$  is the net primary productivity of the  $j$ th grid of the  $i$ -th vegetation ( $gC/(m^2 \cdot a)$ );  $NPP_i$  is the average net primary productivity of the  $i$ -th vegetation ( $gC/(m^2 \cdot a)$ );  $P_{SO_2}$  is the ability to absorb  $SO_2$  ( $kg/(hm^2 \cdot a)$ ) (Table S4).

#### (6) $NO_x$ absorption

$$NA = \sum_k \sum_i \frac{NPP_{ij}}{NPP_i} \times P_{NO_2}$$

where  $NA$  is  $NO_x$  absorption ( $kg/(hm^2)$ ),  $NPP_{ij}$  is the net primary productivity of the  $j$ th grid of the  $i$ -th vegetation ( $gC/(m^2 \cdot a)$ );  $NPP_i$  is the average net primary productivity of the  $i$ -th vegetation ( $gC/(m^2 \cdot a)$ );  $P_{NO_x}$  is the ability to absorb  $NO_x$  ( $kg/(hm^2 \cdot a)$ ) (Table S4).

**Table S4.** The ability of vegetation to absorb air pollutants.

| Type                                                     | SO <sub>2</sub> Absorption Capacity $kg/(hm^2 \cdot a)$ | No <sub>x</sub> absorption Capacity $kg/(hm^2 \cdot a)$ |
|----------------------------------------------------------|---------------------------------------------------------|---------------------------------------------------------|
| Evergreen coniferous forest, deciduous coniferous forest | 215.6                                                   | 6                                                       |
| Broadleaved deciduous forest                             | 88.65                                                   | 6                                                       |
| Theropencedrymion                                        | 152.13                                                  | 6                                                       |
| Deciduous broad leaf shrub forest                        | 15.213                                                  | 0.6                                                     |
| Grassland/ farmland                                      | 15.213                                                  | 0.6                                                     |

From: Report on China's Biodiversity National Conditions, 1998.

#### (7) Humidification

$$HU = Q_{vw} + Q_{ww}$$

$$Q_{vw} = \sum_{ij} LAI_{ij} \times q_{wi} \times 62 \times A_{ij}$$

$$Q_{ww} = \sum_i \alpha_i \times A_i \times ET$$

Where  $HU$  is the total amount of vegetation and wetland humidification ( $kg/a$ );  $Q_{vw}$  is the vegetation evapotranspiration and humidification ( $kg/a$ );  $Q_{ww}$  is the wetland water surface evaporation ( $kg/a$ ),  $A_{ij}$  is the area of the  $j$ th grid of the  $i$ -th vegetation ( $900 m^2$ );  $LAI_{ij}$  is the leaf area index of the  $j$ -th grid of the  $i$ -th vegetation ( $m^2/m^2$ );  $q_{wi}$  is the daily transpiration capacity per unit leaf area of the type  $i$  vegetation ( $kg/(m^2 \cdot d)$ );  $\alpha_i$  is the wetland water surface ratio (%) (Table S 5);  $A_i$  is the area of the  $i$ -th wetland ( $m^2$ );  $ET$  is the water surface evaporation in Shenyang from July to August ( $mm$ ).

**Table S5.** The water surface ratio of different types of wetlands in Shenyang.

| Type         | Water Surface Ratio (%) |
|--------------|-------------------------|
| Herb wetland | 77                      |
| Lake         | 85                      |
| Reservoir    | 85                      |
| River        | 83                      |
| Canal        | 83                      |

#### (8) Soil conservation

Use the Revised Universal Soil Loss Equation (RUSLE) to calculate the soil conservation. The formulas are as following:

$$SC = A_p - A_r$$

$$A_p = R \cdot K \cdot LS$$

$$A_r = R \cdot K \cdot LS \cdot C \cdot P$$

$SC$  is the soil conservation amount per unit area ( $t/(hm^2 \cdot a)$ );  $A_p$  is the potential soil erosion amount per unit area ( $t/(hm^2 \cdot a)$ );  $A_r$  is the actual soil erosion amount per unit area ( $t/(hm^2 \cdot a)$ );  $R$  is the rainfall erosive force ( $MJ \cdot mm/(hm^2 \cdot h \cdot a)$ );  $K$  is the soil erosion erodibility ( $t \cdot h/(MJ \cdot mm)$ );  $LS$  is the slope-slope length factor;  $C$  is the vegetation cover factor;  $P$  is the management factor (soil and water conservation measure factor).  $L$ ,  $S$ ,  $C$ ,  $P$  are dimensionless.

#### (9) Flood regulation

Wetlands are huge reservoirs and natural water resources, which can store excess precipitation during the flood season, and equalize flood runoff. Wetland vegetation can slow down the flood flow rate, reduce the downstream flood peak water level, and make it discharge smoothly, eventually delaying the flood peak time. Thereby reducing flood disasters. At the same time, the floodwater stored in the wetland can be released slowly, which can provide a balanced water supply to the downstream industrial, agricultural, urban and rural residents, and increase the groundwater storage through infiltration to meet the needs of drinking water, industrial water and agricultural irrigation water in dry seasons. Therefore, the flood regulation and storage function of wetlands refers to the flood containment, regulation and storage effect of wetland resources through their own water cycle process.

Rivers, reservoirs, lakes swamps, artificial canals and ponds can provide flood regulation services for Shenyang. The flood regulation is calculated according to their area and average water depth, and the formula is:

$$FR = \sum_i h_i \times A_i$$

In this formula,  $FR$  is the flood regulation capacity of the wetland ( $m^3/a$ );  $h_i$  is the average water depth of the wetland (m);  $A_i$  is the area of the  $i$ -th wetland ( $hm^2$ ).

#### (10) Sand fixation

The Revised wind erosion equation (RWEQ) was used to calculate sand fixation. The formulas are as following:

$$SF = S_{LP} - S_L$$

$$S_{LP} = \frac{2 \cdot z}{S_p^2} Q_{\max P} \cdot e^{-(z/S_p)^2}$$

$$Q_{\max P} = 109.8 (WF \times EF \times SCF \times K')$$

$$S_p = 150.71 \cdot (WF \times EF \times SCF \times K')^{-0.3711}$$

$$S_L = \frac{2 \cdot z}{S^2} Q_{\max} \cdot e^{-(z/S)^2}$$

$$S = 150.71 \cdot (WF \times EF \times SCF \times K' \times C)^{-0.3711}$$

$$Q_{\max} = 109.8 (WF \times EF \times SCF \times K' \times C)$$

where  $SF$  is the amount of sand fixation ( $kg/(m^2 \cdot a)$ );  $S_{LP}$  is the potential wind erosion amount ( $kg/(m^2 \cdot a)$ );  $S_L$  is the actual wind erosion amount ( $kg/(m^2 \cdot a)$ );  $S$  is the key plot length (m);  $S_p$  is the length of the potentially key plot length (m);  $Q_{\max}$  is the maximum transfer amount ( $kg/m$ );  $Q_{\max P}$  is the potential maximum transfer amount ( $kg/m$ );  $z$  is the maximum wind erosion distance (m);  $WF$  is the climate erosion factor ( $kg/m$ );  $K'$  is the surface roughness factor;  $EF$  is the soil erosion factor;  $SCF$  is the soil crust factor;  $C$  is the vegetation cover factor.

# (11) Outdoor recreation

Different landscape variables serve as indicators for the recreation potential. We selected hemeroby, land cover types and terrain roughness as indicators to measure outdoor recreation, and all indicators were considered to equally contribute to the recreation potential and were rescaled to 0–100. The specific calculation process is as follows:

(1) The hemeroby index measures the extent of human impacts on the natural environment on a scale from 1 (natural) to 7 (artificial) and can be attributed to land cover types. The hemeroby was calculated based on land use data. The index was inverted to assign highest recreational values to more natural environments and rescaled from 0 to 100.

(2) Diverse landscapes provide high recreational and visual attractiveness (Kienast et al., 2012; Ode et al., 2009). The landscape diversity was assessed by calculating the number of different land use types per unit. The result was rescaled from 0 to 100. Great landscape diversity indicates high recreation potential.

(3) Rough landscapes provide many recreational opportunities and are visually more appealing than flat landscapes (Weyland & Laterra, 2014). The Terrain Ruggedness Index (TRI) reveals the degree of topographic heterogeneity by measuring elevation differences between adjacent cells (Riley et al., 1999). We calculated the TRI based on the DEM, which was aggregated to 30m×30m and classified into seven classes as proposed by Riley et al. (1999). All scores were rescaled from 0 to 100. High ruggedness suggests high recreation potential.

(4) All indicators were considered to equally contribute to the outdoor recreation. All indicators, which were first rescaled to 0–100, were overlaid to obtain outdoor recreation by summing all layers and dividing them by 3. The outdoor recreation ranges from 0 (low) to 100 (high).

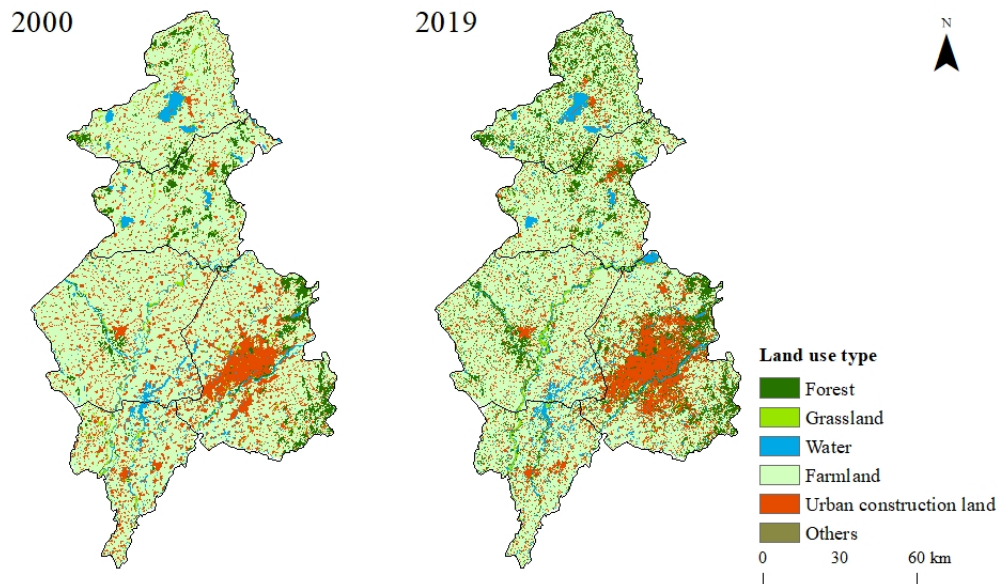

**Figure S1.** Types of land use in Shenyang.

**Table 6.** Data sources.

| Data                                  | Data Sources                                                                                  | Format | Spatial Resolution | Year          |
|---------------------------------------|-----------------------------------------------------------------------------------------------|--------|--------------------|---------------|
| Shenyang administrative boundary data | Shenyang Institute of Applied Ecology, Chinese Academy of Sciences                            | SHP    | —                  | —             |
| DEM                                   | EARTHDATA ( <a href="https://search.asf.alaska.edu/#/">https://search.asf.alaska.edu/#/</a> ) | TIFF   | 90m                | —             |
| Land use                              | Shenyang Institute of Applied Ecology, Chinese Academy of Sciences                            | TIFF   | 30m                | 2000 and 2019 |

|                   |                                                                                                                                                                                                                                                                  |      |      |               |
|-------------------|------------------------------------------------------------------------------------------------------------------------------------------------------------------------------------------------------------------------------------------------------------------|------|------|---------------|
| NDVI              | NASA ( <a href="https://e4ftl01.cr.usgs.gov/MOLT/">https://e4ftl01.cr.usgs.gov/MOLT/</a> )                                                                                                                                                                       | TIFF | 250m |               |
| NPP               | NASA ( <a href="https://e4ftl01.cr.usgs.gov/MOLT/">https://e4ftl01.cr.usgs.gov/MOLT/</a> )                                                                                                                                                                       | TIFF | 500m |               |
| Soil Type         | Harmonized World Soil Database ( <a href="http://www.fao.org/soils-portal/data-hub/soil-maps-and-databases/harmonized-world-soil-database-v12/en/">http://www.fao.org/soils-portal/data-hub/soil-maps-and-databases/harmonized-world-soil-database-v12/en/</a> ) | TIFF | 1km  | —             |
| Temperature       | China Meteorological Data Network<br>( <a href="http://data.cma.cn/">http://data.cma.cn/</a> )                                                                                                                                                                   |      |      |               |
| Precipitation     |                                                                                                                                                                                                                                                                  |      |      |               |
| Wind speed        |                                                                                                                                                                                                                                                                  |      | —    |               |
| Relative humidity |                                                                                                                                                                                                                                                                  | TEXT |      | 2000 and 2019 |
| Sunshine duration |                                                                                                                                                                                                                                                                  |      |      |               |
| Snow depth        | National Tibetan Plateau/Third Pole Environment Data Center<br>( <a href="http://data.tpsc.ac.cn/en/">http://data.tpsc.ac.cn/en/</a> )                                                                                                                           |      | 25km |               |

**Table 7.** Statistics of ES in Shenyang in 2000 and 2019.

|      | FS   | GS    | WC    | CS   | SA    | NA   | HU     | SC     | FR    | SF   | OR    |
|------|------|-------|-------|------|-------|------|--------|--------|-------|------|-------|
| 2000 | 0.24 | 47.75 | 22.92 | 0.68 | 24.97 | 1.10 | 441.60 | 66.02  | 1.523 | 3.36 | 45.36 |
| 2019 | 0.47 | 76.39 | 66.28 | 1.03 | 25.61 | 1.13 | 551.88 | 117.80 | 1.516 | 2.03 | 45.86 |

\*FS: kg/m<sup>2</sup>, GS: g/m<sup>2</sup>, WC: mm, CS: kg/m<sup>2</sup>, SA: kg/hm<sup>2</sup>, NA: kg/hm<sup>2</sup>, HU: kg/m<sup>2</sup>, SC: t/hm<sup>2</sup>, FR: m<sup>3</sup>/m<sup>2</sup>, SF: kg/m<sup>2</sup>, OR: Index.

**Table S8.** Loadings of ES onto each principal component in 2000.

|    | PC1 (28%) | PC2 (19%) | PC3 (13%) | PC4 (11%) |
|----|-----------|-----------|-----------|-----------|
| FS | 0.667     | −0.378    | −0.448    | 0.112     |
| GS | −0.001    | 0.331     | 0.170     | 0.673     |
| SC | 0.442     | −0.197    | 0.073     | −0.337    |
| CS | 0.658     | −0.557    | −0.050    | 0.308     |
| NA | 0.817     | 0.157     | 0.434     | −0.162    |
| HU | 0.451     | −0.532    | −0.288    | 0.369     |
| SF | −0.186    | −0.134    | 0.648     | 0.505     |
| SA | 0.787     | 0.147     | 0.477     | −0.202    |
| FR | 0.144     | 0.636     | −0.425    | 0.313     |
| WC | 0.442     | 0.612     | −0.368    | −0.106    |
| OR | 0.520     | 0.604     | 0.086     | 0.181     |

**Table S9.** Loadings of ES onto each principal component in 2019.

|    | PC1 (31%) | PC2 (18%) | PC3 (13%) | PC4 (10%) |
|----|-----------|-----------|-----------|-----------|
| FS | 0.725     | −0.394    | 0.250     | −0.243    |
| GS | 0.082     | 0.390     | 0.527     | 0.303     |
| SC | 0.500     | −0.115    | −0.355    | −0.232    |
| CS | 0.817     | −0.393    | 0.271     | −0.103    |
| NA | 0.773     | 0.254     | −0.440    | 0.238     |
| HU | 0.593     | −0.554    | 0.360     | −0.060    |
| SF | 0.135     | −0.230    | 0.336     | 0.775     |
| SA | 0.762     | 0.243     | −0.479    | 0.228     |
| FR | 0.105     | 0.657     | 0.442     | −0.255    |
| WC | 0.400     | 0.555     | 0.238     | −0.320    |
| OR | 0.528     | 0.606     | 0.067     | 0.153     |

**Table S10.** The number and proportion of grids per bundle.

|          | 2000  |        | 2019  |        |
|----------|-------|--------|-------|--------|
|          | Grid  | Ratio  | Grid  | Ratio  |
| Bundle 1 | 35233 | 69.93% | 34939 | 69.35% |
| Bundle 2 | 6822  | 13.54% | 7778  | 15.44% |
| Bundle 3 | 2316  | 4.60%  | 2784  | 5.53%  |

|          |      |       |      |       |
|----------|------|-------|------|-------|
| Bundle 4 | 3831 | 7.60% | 3976 | 7.89% |
| Bundle 5 | 2179 | 4.33% | 904  | 1.79% |

**Table S11.** Data source of social-ecological factors.

| Factor                     | Data Sources                                                       |
|----------------------------|--------------------------------------------------------------------|
| Annual rainfall            | China Meteorological Data Network                                  |
| Annual average temperature |                                                                    |
| Average wind speed         |                                                                    |
| Elevation                  | NASA                                                               |
| Population density         | WorldPop                                                           |
| Forest                     | Shenyang Institute of Applied Ecology, Chinese Academy of Sciences |
| Grassland                  |                                                                    |
| Farmland                   |                                                                    |
| Waterbody                  |                                                                    |
| Urban construction land    |                                                                    |

**Table S12.** Distribution of predicted membership in 2000 (Grid).

|          | Bundle 1 | Bundle 2 | Bundle 3 | Bundle 4 | Bundle 5 |
|----------|----------|----------|----------|----------|----------|
| Bundle 1 | 10354    | 41       | 72       | 364      | 93       |
| Bundle 2 | 44       | 1891     | 38       | 90       | 45       |
| Bundle 3 | 29       | 16       | 537      | 14       | 2        |
| Bundle 4 | 99       | 78       | 10       | 629      | 2        |
| Bundle 5 | 33       | 24       | 1        | 6        | 524      |

**Table S13.** Distribution of predicted membership in 2019 (Grid).

|          | Bundle 1 | Bundle 2 | Bundle 3 | Bundle 4 | Bundle 5 |
|----------|----------|----------|----------|----------|----------|
| Bundle 1 | 10314    | 9        | 90       | 483      | 89       |
| Bundle 2 | 69       | 2220     | 20       | 71       | 19       |
| Bundle 3 | 6        | 12       | 721      | 5        | 0        |
| Bundle 4 | 139      | 31       | 7        | 659      | 2        |
| Bundle 5 | 16       | 17       | 0        | 4        | 154      |

## References

- Kienast, F.; Degenhardt, B.; Weilenmann, B.; Wäger, Y.; Buchecker, M. GIS assisted mapping of landscape suitability for nearby recreation. *Landscape And Urban Planning* **2012**, *105*, 385–399.
- Ode, A.; Fry, G.; Tveit, M.S.; Messenger, P.; Miller, D. Indicators of perceived naturalness as drivers of landscape preference. *Journal Of Environmental Management* **2009**, *90*, 375–383.
- Weyland, F.; Laterra, P. Recreation potential assessment at large spatial scales: a method based in the ecosystem services approach and landscape metrics. *Ecological Indicators* **2014**, *39*, 34–43.
- Riley, S.J.; DeGloria, S.D.; Elliot, R. A terrain ruggedness index that quantifies topographic heterogeneity. *1999*, *5*, 23–27.
